# Supplementary material
Source: MDPI journal article supplement (https://www.mdpi.com/2073-4395/12/5/1148)
Supplement: s1 [file s1]

# Influence of water management farming practices on soil organic carbon and nutrients: A case study of Rice farming in Kilombero Valley, Tanzania

Edmond Alavaisha<sup>1,2\*</sup>, Madaka Tumbo<sup>3</sup>, Jacqueline Senyangwa<sup>4,5</sup>, Sixbert Mourice<sup>6</sup>

<sup>1</sup> Institute of Resource Assessment, University of Dar es Salaam, P. O Box 35097, Dar es Salaam, Tanzania.

<sup>2</sup> Bolin Centre for Climate Research, 106 91 Stockholm, Sweden

<sup>3</sup> Water Institute, P. O Box 35059, Dar es Salaam, Tanzania

<sup>4</sup> Department of Chemical Engineering, University of Cape Town, Rondebosch, Cape Town, 7700, South Africa.

<sup>5</sup> Stockholm Environment Institute–Africa Centre, World Agroforestry Centre, United Nations Avenue, Giri, P.O Box 30677, Nairobi, 00100, Kenya

<sup>6</sup> Department of Crop Science and Horticulture, Sokoine University of Agriculture, P. O Box 3005 Morogoro, Tanzania

\* Correspondence: [edmondalavaish@yahoo.com](mailto:edmondalavaish@yahoo.com) ; Tel.: +255 719 964 870 (EA)

## Supplementary materials

**Table S1.** Multivariate analysis of variance (MANOVA) to show difference in SOC, nutrient and physical properties of soil among farming management practices and depth at Kilombero Valley

| Management       |                       | df | Mean Square | F      | P value |
|------------------|-----------------------|----|-------------|--------|---------|
| Farming Practice | pH                    | 4  | 1.014       | 2.821  | 0.031*  |
|                  | BD gcm <sup>-3</sup>  | 4  | 0.194       | 12.085 | 0.000*  |
|                  | Porosity              | 4  | 0.033       | 8.223  | 0.000*  |
|                  | SOC gkg <sup>-1</sup> | 4  | 672.105     | 6.647  | 0.000*  |
|                  | TN gkg <sup>-1</sup>  | 4  | 4.060       | 6.165  | 0.000*  |
|                  | TP gkg <sup>-1</sup>  | 4  | 6.438       | 3.658  | 0.009*  |
| Depth            | pH                    | 3  | 0.421       | 1.171  | 0.326   |
|                  | BD gcm <sup>-3</sup>  | 3  | 0.162       | 10.069 | 0.000*  |
|                  | Porosity              | 3  | 0.022       | 5.517  | 0.002*  |
|                  | SOC gkg <sup>-1</sup> | 3  | 556.925     | 5.508  | 0.002*  |
|                  | TN gkg <sup>-1</sup>  | 3  | 4.852       | 7.367  | 0.000*  |
|                  | TP gkg <sup>-1</sup>  | 3  | 0.763       | 0.434  | 0.730   |
| Practice * Depth | pH                    | 12 | 0.130       | 0.362  | 0.973   |
|                  | BD gcm <sup>-3</sup>  | 12 | 0.008       | 0.512  | 0.901   |
|                  | Porosity              | 12 | 0.004       | 0.944  | 0.508   |
|                  | SOC gkg <sup>-1</sup> | 12 | 62.385      | 0.617  | 0.021*  |
|                  | TN gkg <sup>-1</sup>  | 12 | 0.269       | 0.409  | 0.043*  |
|                  | TP gkg <sup>-1</sup>  | 12 | 2.208       | 1.255  | 0.263   |

\*=significant at 0.05

**Table S2.** Post hock Turkey test results to show direction of variation of soil properties and nutrients among farming practices and depth at Kilombero valley

|                  |       |       | pH     | BD     | Porosity | SOC    | TN     | TP     |
|------------------|-------|-------|--------|--------|----------|--------|--------|--------|
| Farming practice | A     | B     | 0.996  | 0.996  | 0.996    | 0.997  | 0.839  | 0.995  |
|                  | A     | C     | 0.000* | 0.000* | 0.000*   | 0.001* | 0.009* | 0.271  |
|                  | A     | D     | 0.009* | 0.452  | 0.009*   | 0.453  | 0.966  | 0.054  |
|                  | A     | E     | 0.033* | 0.934  | 0.033    | 0.934  | 0.999  | 0.037* |
|                  | B     | C     | 0.001* | 0.000* | 0.000*   | 0.000* | 0.000* | 0.494  |
|                  | B     | D     | 0.002* | 0.269  | 0.026*   | 0.270  | 0.998  | 0.130  |
|                  | B     | E     | 0.081  | 0.785  | 0.081    | 0.785  | 0.835  | 0.098  |
|                  | C     | D     | 0.844  | 0.162  | 0.844    | 0.162  | 0.002* | 0.908  |
|                  | C     | E     | 0.428  | 0.008* | 0.429    | 0.009* | 0.009* | 0.895  |
|                  | D     | E     | 0.975  | 0.881  | 0.975    | 0.881  | 0.965  | 0.999  |
| Depth (cm)       | 0-20  | 20-30 | 0.652  | 0.008* | 0.02*    | 0.073  | 0.088  | 0.851  |
|                  | 0-20  | 30-40 | 0.340  | 0.000* | 0.029*   | 0.004* | 0.005* | 0.986  |
|                  | 0-20  | 40-50 | 0.314  | 0.000* | 0.002*   | 0.004* | 0.000* | 0.995  |
|                  | 20-30 | 30-40 | 0.954  | 0.828  | 0.999    | 0.706  | 0.728  | 0.662  |
|                  | 20-30 | 40-50 | 0.941  | 0.250  | 0.841    | 0.717  | 0.175  | 0.720  |
|                  | 30-40 | 40-50 | 0.999  | 0.741  | 0.765    | 0.999  | 0.736  | 0.999  |

\*=significant at 0.05
